# Supplementary material for: Sensing a bud in the yeast morphogenesis checkpoint: a role for Elm1
Source: PubMed Central journal article supplement — Mol Biol Cell. 2016 Jun 1;27(11):1764–75. doi: 10.1091/mbc.E16-01-0014 (PMC4884067; doi:10.1091/mbc.e16-01-0014), 2016-06-01
Supplement: supp_E16-01-0014v1_CombinedSupMats.pdf [file supp_E16-01-0014v1_CombinedSupMats.pdf]

# Supplemental Materials

*Molecular Biology of the Cell*

Kang et al.

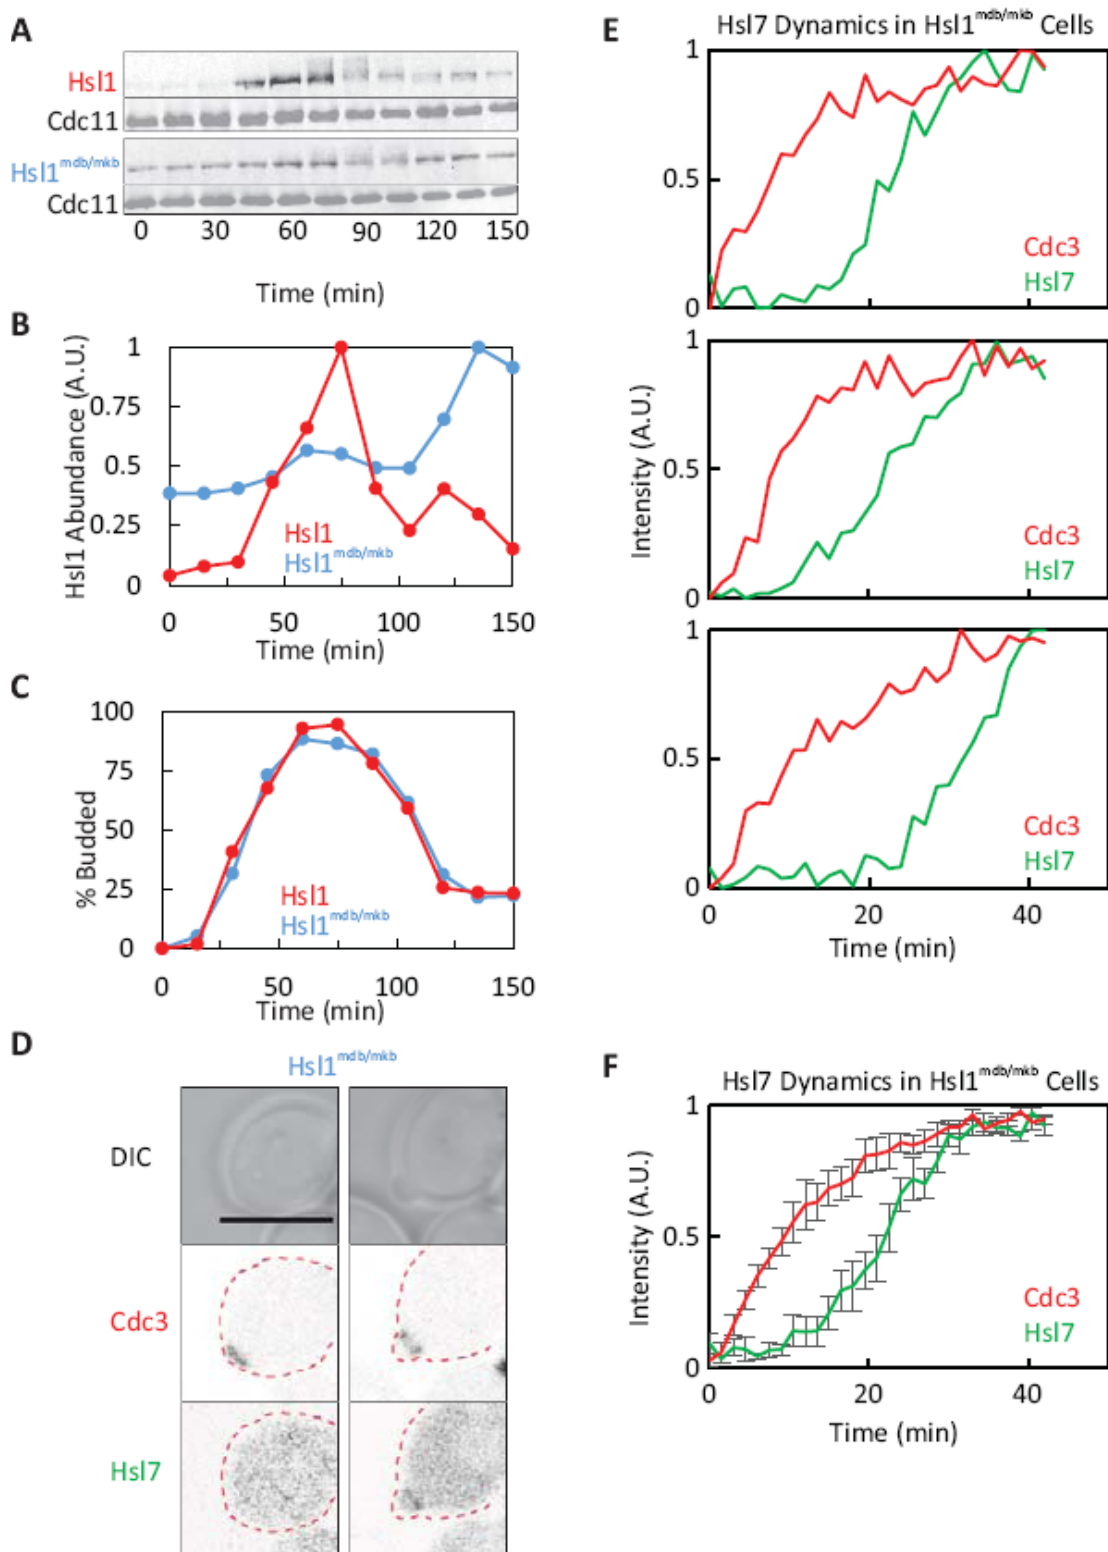

**Figure S1. Blocking Hsl1 degradation does not advance recruitment of Hsl7 to the septin ring.** A) Blocking Hsl1 degradation. Western blot showing levels of Hsl1-myc (DLY7318: upper) and Hsl1<sup>mdb/mkb</sup>-myc (DLY17668: lower) along with corresponding loading controls (Cdc11) from pheromone arrest-release-arrest synchrony experiments.

B) Quantification of Hsl1 abundance (normalized to Cdc11 control for each lane) from Western blots in A). C) Cell-cycle synchrony for the experiment above was assessed by scoring the % of budded cells. D) Images of Cdc3-mCherry and overexpressed GFP-Hsl7 in cells with nondegradable Hsl1 (DLY17800). E) Quantification of septin and Hsl7 recruitment with time in individual cells. F) Average fluorescence intensities from n=20 cells, aligned to the first timepoint that septins became detectable. Error bars, standard deviation. Scale bar, 5  $\mu$ m.
